# Supplementary material for: Disruption of YY1-EZH2 Interaction Using Synthetic Peptides Inhibits Breast Cancer Development
Source: MDPI journal article supplement (doi:10.3390/cancers13102402), 2021-05-16
Supplement: s1 [file s1]

Supplementary Figure 3.

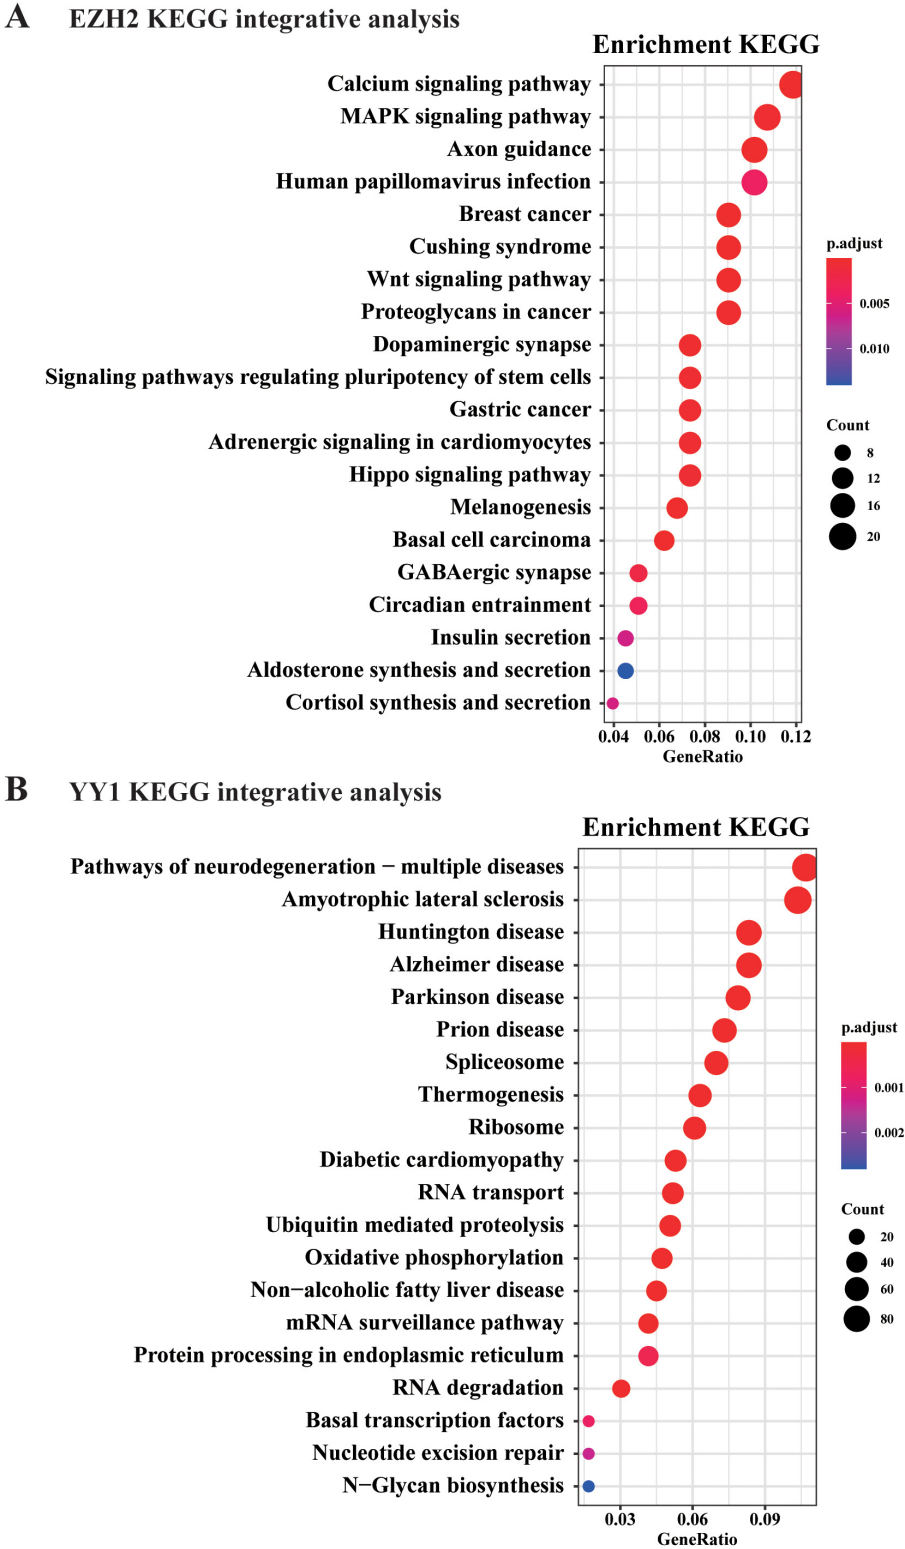

Supplementary Figure 3. Integrative analyses of currently available YY1 (A) and

**EZH2 (B) ChIP-seq datasets in the ENCODE database.** In A, integrative analyses of eight YY1 ChIP-seq datasets (ENCFF589PZO, ENCFF398UQZ, ENCFF352MLK, ENCFF042OEY, ENCFF958OUE, ENCFF246QIY, ENCFF567CJH and ENCFF545PFH) available in the ENCODE database (<https://www.encodeproject.org/>). In B, integrative analyses of two EZH2 ChIP-seq datasets (ENCFF521AKL and ENCFF545XSF) available in the ENCODE database. In both A and B, the top 20 GO terms of the KEGG pathway enrichment analyses of the integrative data are presented.
