# Supplementary material for: Disruption of YY1-EZH2 Interaction Using Synthetic Peptides Inhibits Breast Cancer Development
Source: MDPI journal article supplement (doi:10.3390/cancers13102402), 2021-05-16
Supplement: s1 [file s1]

Supplementary Figure 5.

A

YPB-caused  
H3K27me3 increase

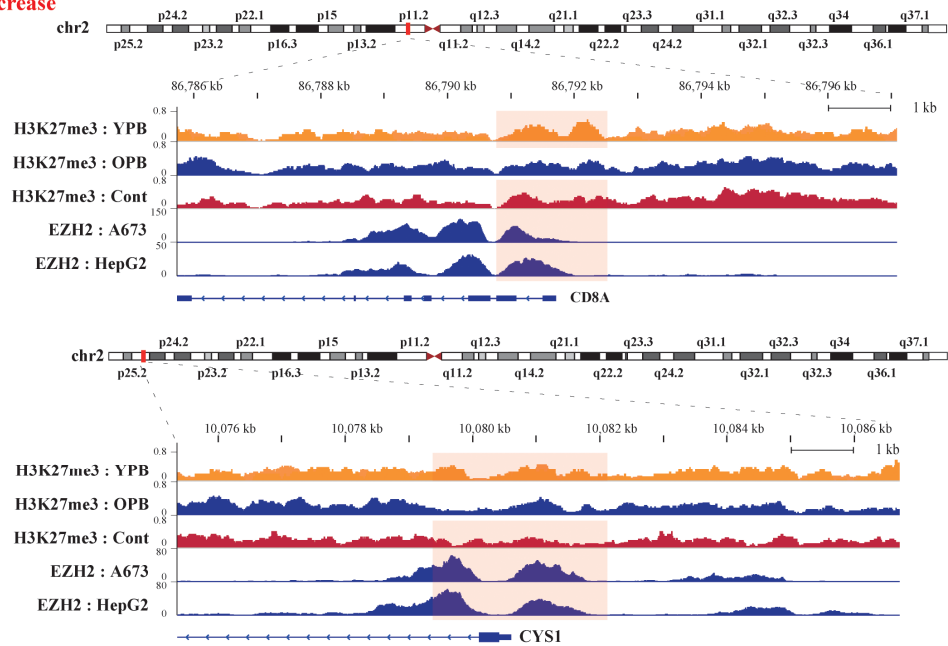

OPB-caused  
H3K27me3 increase

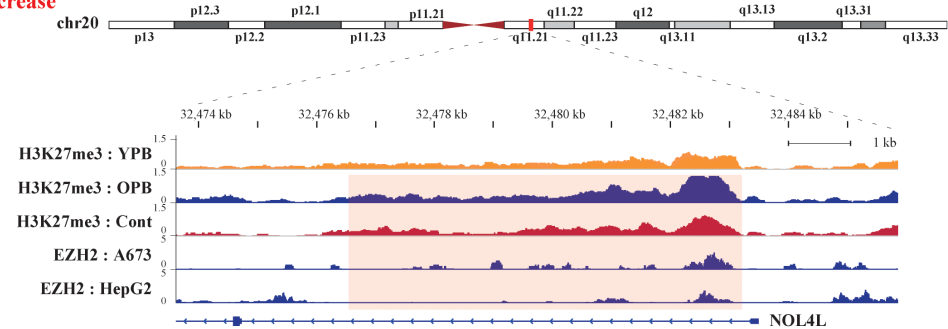

YPB/OPB-caused  
H3K27me3 increase

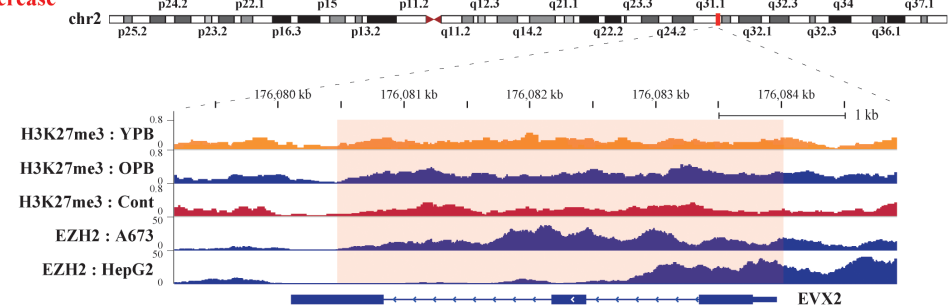

**B** YPB-caused  
H3K27me3 decrease

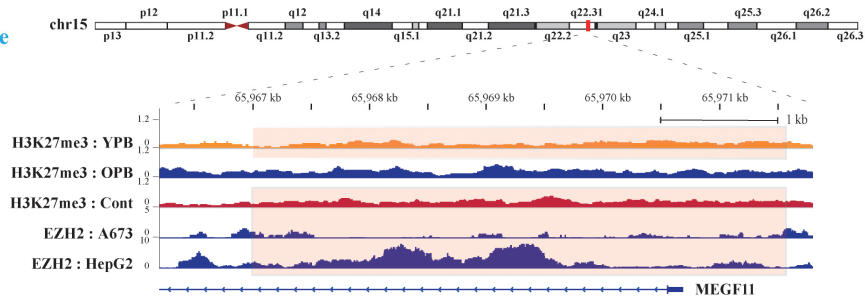

OPB-caused  
H3K27me3 decrease

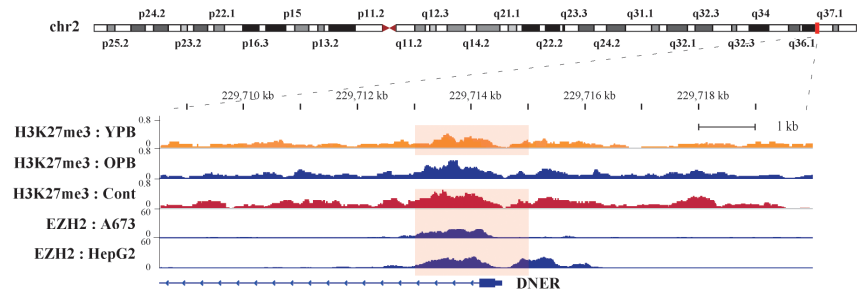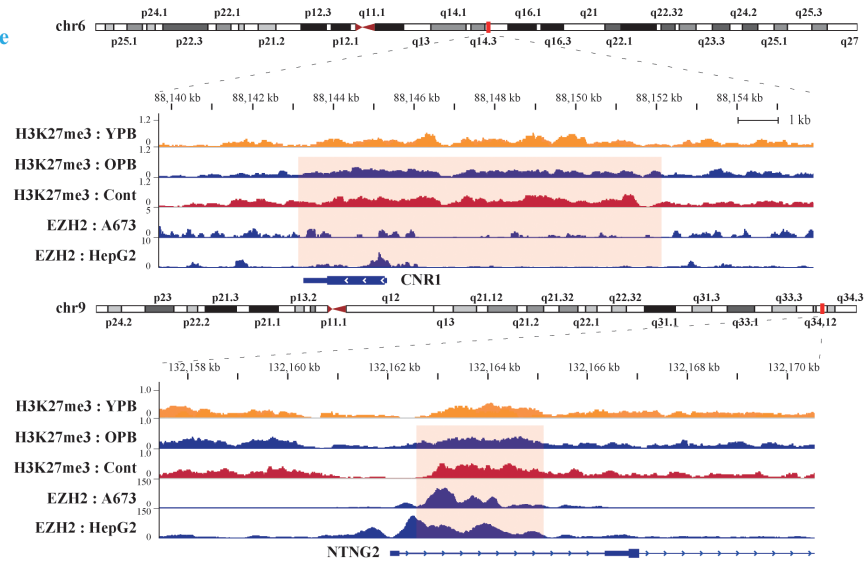

YPB/OPB-caused  
H3K27me3 decrease

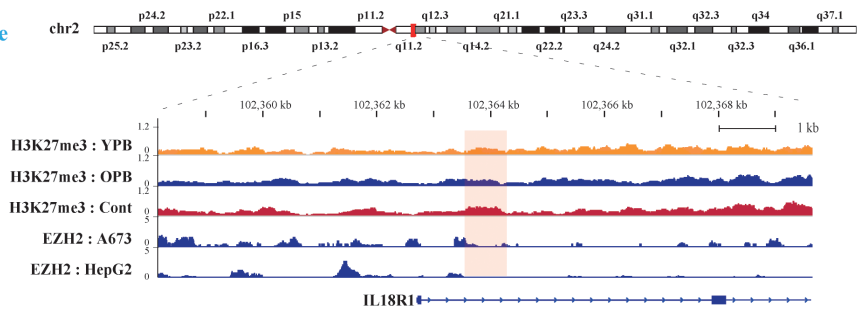

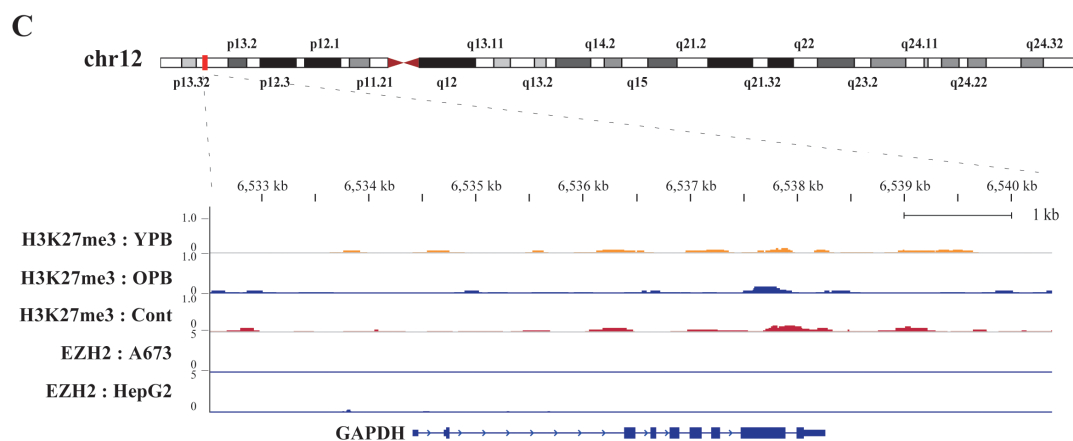

**Supplementary Figure 5. Aligned gene browser tracks between the H3K27me3 ChIP-seq dataset from the YPB/OPB-treated MDA-MB-231 cells and two EZH2 ChIP-seq datasets from other cell lines.** Both increased (A) and decreased (B) H3K27me3 signals caused by YPB, OPB or both treatments are presented, together with the EZH2 ChIP-seq signals from the A673 and HepG2 cells (ENCFF521AKL and ENCFF545XSF in the ENCODE database) at the same loci. The regions of the tracks with increased (in A) and decreased (in B) changes are marked with shadows. In C, the gene browser tracks of the GAPDH gene locus are presented.
