# Supplementary material for: Disruption of YY1-EZH2 Interaction Using Synthetic Peptides Inhibits Breast Cancer Development
Source: MDPI journal article supplement (doi:10.3390/cancers13102402), 2021-05-16
Supplement: s1 [file s1]

**Table 1.** Genes with the same (increased or decreased) trends of H3K27me3 alterations in MDA-MB-231 cells treated by YPB and OPB peptides versus Cont peptide in the ChIP-seq studies.

|            | H3K27me3 ChIP signal                                                                                                                                                                                                                                                                                                                                                                                                                                                                                                                                                                                                                                                                                                                                                                                                                                                                |                                                                                                                                                                                                                                                                                                                                                                           |
|------------|-------------------------------------------------------------------------------------------------------------------------------------------------------------------------------------------------------------------------------------------------------------------------------------------------------------------------------------------------------------------------------------------------------------------------------------------------------------------------------------------------------------------------------------------------------------------------------------------------------------------------------------------------------------------------------------------------------------------------------------------------------------------------------------------------------------------------------------------------------------------------------------|---------------------------------------------------------------------------------------------------------------------------------------------------------------------------------------------------------------------------------------------------------------------------------------------------------------------------------------------------------------------------|
|            | Increased (93 genes)                                                                                                                                                                                                                                                                                                                                                                                                                                                                                                                                                                                                                                                                                                                                                                                                                                                                | Decreased (38 genes)                                                                                                                                                                                                                                                                                                                                                      |
| Gene names | RAB11FIP4, SPNS3, PEAR1, HSD17B3, MYCBPAP, TSSK1B,<br>CACNB3, TTLL6, SNED1, AC126915.1, RPSAP69, AC118754.1,<br>C10orf105, EVX2, AC021491.1, RBP4, MATN2, DHRS3, GRK1,<br>OR4R1P, EEF1A1P8, MEGF6, AC113348.1, DMKN, AC090955.1,<br>YPEL2, MARK1, LINC00051, AC080078.1, CARNS1, FER1L4,<br>AL049833.3, MUC21, SMAD6, RN7SL33P, PCSK9, OR4A42P, HCN2,<br>KCNMA1, AC017033.1, DIPK1B, MIR551A, RASGEF1C, HCAR1,<br>OSBPL5, RAPGEF3, AC093392.1, RHCG, AL390726.6, INPP5J,<br>CASC15, PLEKHA7, CLPSL2, RNF183, TFEB, AC004080.1,<br>AL354984.3, ATOH8, TMPRSS6, FBN3, AC087645.3, AC011840.1,<br>NCS1, GSN, ENPP7, DEGS2, CLEC2L, PRKCZ, MFAP3, TMEM105,<br>VASH1, GGT7, RAB15, RN7SKP280, GALNT16, AC091932.4,<br>PMEPA1, PPY2P, PIK3C2B, KLHDC8A, LINC01978, AL096828.1,<br>JAG2, GRHL3, AC025437.6, AC090825.1, PPP1R32, AL359853.1,<br>LRRN4, AC244517.5, PPIE, UCMA, RARRES2P11. | PTENP1, RN7SKP73, FLT4,<br>AC007638.1, SLCO2B1, LIFR, SCD,<br>OR5B3, MYH10, TRIM26BP, RNU6-<br>129P, AL162726.3, RNA5SP154,<br>SLFN14, OXCT1, CLVS1, IFT81,<br>CFAP221, CA11, AC002375.1,<br>OR5W2, RNU6-662P, AC018697.1,<br>LINC01866, KHDRBS3, RNU6-114P,<br>AC134508.1, AC046168.2, HSPE1P1,<br>IL18R1, ARMC3, KRT26,<br>MIR3142HG, FAM153A, LAMA5,<br>MAP7D2, HOOK1. |
